# Supplementary material for: Monitoring the emotional facial reactions of individuals with antisocial personality disorder during the retrieval of self-defining memories
Source: PLoS One. 2022 Jun 8;17(6):e0268818. doi: 10.1371/journal.pone.0268818 (PMC9176833; doi:10.1371/journal.pone.0268818)
Supplement: S1 Data — (XLSX) [file pone.0268818.s001.xlsx]

## Sheet: Feuil1
CodeParticipant	Age	NbYearsStudy	Group	NbSDM	ValenceSDM	Neutral	happy	sad	angry	scared	Dominance	Emotional_Dominance
1_3	39	9	ASPD	SDM1	neutral	0.255362	0.00358887	0.000141517	0.555459	0.00197495	angry	angry
1_3	39	9	ASPD	SDM2	neutral
1_3	39	9	ASPD	SDM3	positive	0.452465	0.00395784	0.00320865	0.152239	0.00598742	neutral	angry
1_3	39	9	ASPD	SDM4	mixed	0.429789	0.00624144	0.0570083	0.231246	0.0341994	neutral	angry
1_3	39	9	ASPD	SDM5	negative	0.381845	0.0151124	0.0294205	0.252268	0.0186161	neutral	angry
1_4	57	5	ASPD	SDM1	neutral	0.207629	0.325823	0.00254362	0.182666	0.0642399	happy	happy
1_4	57	5	ASPD	SDM2	neutral	0.239726	0.176276	0.0090627	0.207448	0.0420227	neutral	angry
1_4	57	5	ASPD	SDM3	neutral	0.267091	0.076171	0.00299218	0.195769	0.14603	neutral	angry
1_4	57	5	ASPD	SDM4	neutral	0.251414	0.105334	0.00636913	0.135708	0.190307	neutral	scared
1_4	57	5	ASPD	SDM5	neutral	0.278126	0.0843862	0.0121205	0.213762	0.0945802	neutral	angry
1_5	47	9	ASPD	SDM1	mixed	0.0789943	0.000457181	0.000242987	0.185809	0.544727	fear	scared
1_5	47	9	ASPD	SDM2	mixed	0.132078	0.00650507	0.0203443	0.236726	0.174377	angry	angry
1_5	47	9	ASPD	SDM3	positive	0.18015	0.0276164	0.0134	0.197329	0.227698	fear	scared
1_6	28	9	ASPD	SDM1	neutral	0.149742	0.0271909	0.0123613	0.471849	0.353909	angry	angry
1_6	28	9	ASPD	SDM2	neutral	0.236695	0.0017948	0.00305866	0.611433	0.0131999	angry	angry
1_6	28	9	ASPD	SDM3	negative	0.267762	0.0332265	0.00218889	0.312908	0.114412	angry	angry
1_6	28	9	ASPD	SDM4	neutral	0.271264	0.267281	0.0027701	0.0950408	0.147634	neutral	happy
1_6	28	9	ASPD	SDM5	negative	0.218037	0.0495745	0.00675265	0.364864	0.124276	angry	angry
1_7	56	12	ASPD	SDM1	neutral	0.292609	0.0471625	3.30408e-05	0.374645	7.6939e-05	angry	angry
1_7	56	12	ASPD	SDM2	positive
1_7	56	12	ASPD	SDM3	positive	0.242303	0.0133837	6.95024e-05	0.377029	0.00513911	angry	angry
1_7	56	12	ASPD	SDM4	neutral	0.311072	0.0312418	0.00120069	0.317291	0.00357026	angry	angry
1_7	56	12	ASPD	SDM5	neutral	0.277071	0.0785691	4.74648e-05	0.285408	0.0124832	angry	angry
1_8	49	9	ASPD	SDM1	mixed	0.295928	0.000977468	0.0132595	0.480645	0.207071	angry	angry
1_8	49	9	ASPD	SDM2	negative	0.257616	0.0122351	0.0287568	0.419908	0.235712	angry	angry
1_8	49	9	ASPD	SDM3	mixed	0.243348	0.00160934	0.0260219	0.444359	0.28138	angry	angry
1_8	49	9	ASPD	SDM4	mixed	0.229455	0.0171463	0.0145169	0.55013	0.157806	angry	angry
1_8	49	9	ASPD	SDM5	mixed	0.243998	0.0017258	0.0680242	0.376911	0.22527	angry	angry
1_10	27	9	ASPD	SDM1	positive	0.360642	0.115225	8.04125e-05	0.00234346	0.233759	neutral	scared
1_10	27	9	ASPD	SDM2	neutral	0.306042	0.00351052	0.00240924	5.2228e-05	0.123902	neutral	scared
1_10	27	9	ASPD	SDM3	neutral	0.0460233	9.467e-06	0.0423897	1.846e-06	0.000601987	neutral	sad
1_10	27	9	ASPD	SDM4	neutral	0.0831793	0.00187075	0.00198834	3.42701e-05	7.56792e-05	neutral	sad
1_11	58	5	ASPD	SDM1	neutral	0.18113	0.0184199	0.00748828	0.338812	0.0119161	angry	angry
1_11	58	5	ASPD	SDM2	neutral	0.246835	0.00612475	0.0024587	0.0432638	0.0157006	neutral	angry
1_11	58	5	ASPD	SDM3	positive	0.286941	0.0325483	0.0032552	0.175044	0.010014	neutral	angry
1_11	58	5	ASPD	SDM4	negative	0.278676	0.0357966	0.00213302	0.252745	0.00995617	neutral	angry
1_11	58	5	ASPD	SDM5	mixed	0.23939	0.0171206	0.00898554	0.314591	0.0109273	angry	angry
1_12	36	12	ASPD	SDM1	negative	0.156892	0.0223234	1.54381e-05	0.641503	0.112414	angry	angry
1_12	36	12	ASPD	SDM2	positive	0.114404	0.086694	6.7004e-05	0.669279	0.169384	angry	angry
1_12	36	12	ASPD	SDM3	positive	0.141915	0.132731	8.23136e-05	0.410869	0.112252	angry	angry
1_12	36	12	ASPD	SDM4	mixed	0.129005	0.172549	0.00564146	0.474512	0.0943057	angry	angry
1_12	36	12	ASPD	SDM5	positive	0.161172	0.0511744	0.00220701	0.573182	0.121958	angry	angry
1_14	54	9	ASPD	SDM1	neutral	0.315283	0.0821497	0.041171	0.0497258	0.201109	neutral	scared
1_14	54	9	ASPD	SDM2	positive	0.241767	0.0818128	0.0528379	0.0378236	0.366398	fear	scared
1_14	54	9	ASPD	SDM3	negative	0.226834	0.0274681	0.0616361	0.26233	0.202971	angry	angry
1_14	54	9	ASPD	SDM4	neutral	0.231101	0.0528617	0.145647	0.0158484	0.311132	fear	scared
1_15	39	16	ASPD	SDM1	neutral	0.622066	0.0224552	0.00763003	0.00959752	0.000966666	neutral	happy
1_15	39	16	ASPD	SDM2	negative	0.292735	0.00180721	4.55154e-06	0.147367	0.0124568	neutral	angry
1_15	39	16	ASPD	SDM3	neutral	0.474196	0.131463	4.47858e-06	0.104606	0.000103044	neutral	happy
1_15	39	16	ASPD	SDM4	positive	0.388296	0.0202642	0.000133509	0.368304	0.000835863	neutral	angry
1_15	39	16	ASPD	SDM5	positive	0.471888	0.0701921	9.40305e-06	0.126609	0.000220999	neutral	angry
1_17	21	5	ASPD	SDM1	mixed	0.189985	0.0777032	0.000232091	0.727388	0.0160463	angry	angry
1_17	21	5	ASPD	SDM2	negative	0.217552	0.0090088	0.000432156	0.636989	0.0603517	angry	angry
1_17	21	5	ASPD	SDM3	positive	0.306283	0.0132731	0.00296044	0.33319	0.0161325	angry	angry
1_17	21	5	ASPD	SDM4	neutral	0.362072	0.0434952	0.00138654	0.13767	0.0228139	neutral	angry
1_17	21	5	ASPD	SDM5	positive	0.248126	0.0191841	0.0144387	0.424512	0.0351292	angry	angry
2_1	27	9	ASPD	SDM1	neutral
2_1	27	9	ASPD	SDM2	neutral	0.210446	0.00158369	0.00758808	0.665664	0.00011324	angry	angry
2_1	27	9	ASPD	SDM3	neutral	0.160172	0.000606071	0.00976705	0.624725	0.00562954	angry	angry
2_1	27	9	ASPD	SDM4	positive	0.157051	0.00969938	0.0634065	0.528496	0.0239885	angry	angry
2_1	27	9	ASPD	SDM5	neutral	0.125647	0.000112268	0.137106	0.671476	7.61354e-06	angry	angry
2_2	29	9	ASPD	SDM1	positive	0.141285	0.419467	0.0209714	0.0326227	0.0614829	happy	happy
2_2	29	9	ASPD	SDM2	neutral	0.352614	0.257635	0.0515005	0.0719615	0.00251683	neutral	happy
2_2	29	9	ASPD	SDM3	mixed	0.241095	0.117563	0.277518	0.105209	0.0215733	sad	sad
2_2	29	9	ASPD	SDM4	positive	0.386821	0.168077	0.0174957	0.00131351	0.0285279	neutral	happy
2_2	29	9	ASPD	SDM5	negative
2_3	33	12	ASPD	SDM1	neutral	0.142614	6.34742e-05	0.0591115	0.654202	0.00185396	angry	angry
2_3	33	12	ASPD	SDM2	positive	0.123488	0.000384641	0.038126	0.628703	0.006919	angry	angry
2_3	33	12	ASPD	SDM3	negative	0.199599	0.000132895	0.0889683	0.325254	0.000728784	angry	angry
2_3	33	12	ASPD	SDM4	mixed	0.161094	0.0139687	0.125984	0.226601	0.0163444	angry	angry
2_3	33	12	ASPD	SDM5	negative	0.133659	0.000757909	0.0750579	0.384575	0.00127053	angry	angry
3_2	45	12	ASPD	SDM1	positive	0.346579	0.000424281	0.110066	0.111113	0.00108228	neutral	angry
3_2	45	12	ASPD	SDM2	negative	0.321081	0.000481051	0.0421094	0.0897469	0.00222596	neutral	angry
3_2	45	12	ASPD	SDM3	mixed	0.303322	0.000303847	0.0393487	0.101013	0.0046638	neutral	angry
3_2	45	12	ASPD	SDM4	mixed	0.298724	0.00698573	0.0385515	0.0827812	0.00404177	neutral	angry
3_2	45	12	ASPD	SDM5	mixed	0.288011	0.00343752	0.0447597	0.0940707	0.0126612	neutral	angry
3_3	54	9	ASPD	SDM1	neutral	0.188492	0.0529432	0.0197669	0.530434	0.00043427	angry	angry
3_3	54	9	ASPD	SDM2	negative	0.125522	0.324148	0.000330317	0.349013	0.0037429	angry	angry
3_3	54	9	ASPD	SDM3	negative	0.148324	0.298529	0.0190017	0.0840608	0.0216706	happy	happy
3_3	54	9	ASPD	SDM4	negative	0.172502	1e-16	0.000415888	0.0210211	0.00802547	neutral	angry
3_3	54	9	ASPD	SDM5	neutral
3_4	33	12	ASPD	SDM1	neutral	0.277637	0.0302317	2.23169e-05	0.460409	0.0254022	angry	angry
3_4	33	12	ASPD	SDM2	positive	0.399796	0.0616017	0.00129375	0.0920355	0.0700769	neutral	angry
3_4	33	12	ASPD	SDM3	negative	0.243019	0.153386	0.0344616	0.0550652	0.0748718	neutral	happy
3_4	33	12	ASPD	SDM4	positive	0.261114	0.153026	0.00247788	0.0737992	0.216583	neutral	scared
3_4	33	12	ASPD	SDM5	negative	0.144376	0.0339541	0.053144	0.0528283	0.138538	neutral	scared
3_5	63	9	ASPD	SDM1	neutral	0.481867	0.0796124	5.68816e-05	0.0785654	0.0311092	neutral	happy
3_5	63	9	ASPD	SDM2	negative	0.356844	0.113791	0.000499516	0.015872	0.0307601	neutral	happy
3_5	63	9	ASPD	SDM3	neutral	0.356361	0.0330355	0.00275313	0.308604	0.0166609	neutral	angry
3_5	63	9	ASPD	SDM4	negative	0.456383	0.0270439	0.00552772	0.123297	0.0566918	neutral	angry
3_5	63	9	ASPD	SDM5	mixed	0.395137	0.105434	0.00424015	0.141829	0.0468082	neutral	angry
3_6	72	9	ASPD	SDM1	negative	0.251421	0.0742882	0.00523272	0.322321	0.0255028	angry	angry
3_6	72	9	ASPD	SDM2	neutral	0.204264	0.0290829	0.00917039	0.451777	0.0164886	angry	angry
3_6	72	9	ASPD	SDM3	negative	0.289061	0.185518	0.0100676	0.187094	0.0589139	neutral	angry
3_6	72	9	ASPD	SDM4	mixed	0.265432	0.0662268	0.00727117	0.355205	0.0232009	angry	angry
3_6	72	9	ASPD	SDM5	positive	0.288498	0.109539	0.0197222	0.277139	0.029221	neutral	angry
3_8	59	9	ASPD	SDM1	mixed	0.145696	0.0542553	5.21798e-05	0.323084	0.013921	angry	angry
3_8	59	9	ASPD	SDM2	mixed	0.150328	0.0708003	0.00100223	0.311823	0.00757632	angry	angry
3_8	59	9	ASPD	SDM3	positive	0.209787	0.0776904	0.00243735	0.365867	0.00460461	angry	angry
3_8	59	9	ASPD	SDM4	mixed	0.193224	0.172554	0.000143107	0.25597	0.0204814	angry	angry
3_8	59	9	ASPD	SDM5	mixed	0.189958	0.0961001	0.00115682	0.345609	0.0133673	angry	angry
0.2	26	17	Control	SDM1	mixed	0.191284	0.0136604	0.230642	0.168656	0.118477	sad	sad
0.2	26	17	Control	SDM2	mixed	0.222603	1e-13	0.405424	0.0789639	0.142434	sad	sad
0.2	26	17	Control	SDM3	positive	0.166805	0.105031	0.338782	0.00450396	0.144604	sad	sad
0.2	26	17	Control	SDM4	negative	0.212539	0.0119178	0.118176	0.180931	0.143615	neutral	angry
0.2	26	17	Control	SDM5	negative	0.222836	0.0352653	0.176406	0.181006	0.10917	neutral	angry
0.7	25	15	Control	SDM1	negative	0.0809881	0.00339462	0.10496	0.00578834	3.37688e-05	sad	sad
0.7	25	15	Control	SDM2	positive	0.171625	0.00645412	0.203712	0.104583	0.000551439	sad	sad
0.7	25	15	Control	SDM3	negative	0.287948	0.000299519	0.175158	0.14144	0.000586603	neutral	sad
0.7	25	15	Control	SDM4	negative	0.164275	0.000180564	0.145323	0.0480049	0.000404946	neutral	sad
0.7	25	15	Control	SDM5	neutral	0.240241	3.0317e-06	0.147487	0.167005	0.00133664	neutral	angry
0.8	26	15	Control	SDM1	mixed	0.151717	0.000512587	0.0145103	0.529662	0.00203674	angry	angry
0.8	26	15	Control	SDM2	positive	0.279251	0.0189939	0.0172067	0.260238	0.0123583	neutral	angry
0.8	26	15	Control	SDM3	mixed	0.380874	0.0157175	0.0237495	0.151534	0.0187196	neutral	angry
0.8	26	15	Control	SDM4	negative	0.403837	0.00589921	0.0356186	0.0702906	0.0381584	neutral	angry
0.8	26	15	Control	SDM5	negative	0.318278	0.00707898	0.0530706	0.22805	0.00765313	neutral	angry
0.13	25	15	Control	SDM1	positive	0.224886	0.336853	0.00164127	0.0548938	0.000787929	happy	happy
0.13	25	15	Control	SDM2	mixed	0.14155	0.157683	0.0502795	0.00126507	3.86883e-05	happy	happy
0.13	25	15	Control	SDM3	negative	0.154313	0.0618731	0.0765485	0.00159813	9.29575e-05	neutral	sad
0.13	25	15	Control	SDM4	mixed	0.163936	0.201559	0.0488306	0.000257614	3.12426e-05	happy	happy
0.13	25	15	Control	SDM5	positive	0.249898	0.253001	0.00218025	0.00613033	0.000204276	happy	happy
0.16	29	15	Control	SDM1	mixed	0.366458	0.240613	0.000264953	0.258172	0.000610057	neutral	angry
0.16	29	15	Control	SDM2	positive	0.245248	0.405819	0.00389908	0.124323	0.000733929	happy	happy
0.16	29	15	Control	SDM3	mixed	0.283249	0.153573	0.00872389	0.15178	0.000262548	neutral	happy
0.16	29	15	Control	SDM4	mixed	0.224802	0.436332	0.00268383	0.112876	0.00139854	happy	happy
0.16	29	15	Control	SDM5	mixed	0.245079	0.323081	0.00562465	0.152107	0.00111209	happy	happy
0.22	27	17	Control	SDM1	neutral	0.264755	0.0370189	0.156474	0.0147633	0.0014792	neutral	sad
0.22	27	17	Control	SDM2	positive	0.383971	0.0972121	0.0660618	0.028187	0.00133584	neutral	happy
0.22	27	17	Control	SDM3	positive	0.380666	0.109589	0.0689321	0.0195686	0.0012523	neutral	happy
0.22	27	17	Control	SDM4	negative	0.314225	0.0969353	0.0805293	0.017214	0.00114366	neutral	happy
0.22	27	17	Control	SDM5	neutral	0.32682	0.112224	0.063147	0.00864583	0.000808298	neutral	happy
0.24	27	17	Control	SDM1	mixed	0.316836	0.174508	0.00553112	0.00102699	0.00367908	neutral	happy
0.24	27	17	Control	SDM2	mixed	0.233467	0.022114	0.00147211	0.0185486	0.000807854	neutral	happy
0.24	27	17	Control	SDM3	mixed	0.204846	0.0298542	0.0108107	0.0341198	2.35186e-05	neutral	angry
0.24	27	17	Control	SDM4	mixed	0.249024	0.0690006	0.00983845	0.0173092	0.000902022	neutral	happy
0.24	27	17	Control	SDM5	mixed	0.160158	0.081188	0.0268296	0.0144547	0.00247353	neutral	happy
0.25	25	15	Control	SDM1	negative	0.29582	0.117063	0.042398	0.0251433	0.00322832	neutral	happy
0.25	25	15	Control	SDM2	negative	0.288309	0.107481	0.0239026	0.0274599	0.0035882	neutral	happy
0.25	25	15	Control	SDM3	positive	0.294462	0.0668699	0.0123259	0.0391229	0.0084711	neutral	happy
0.25	25	15	Control	SDM4	positive	0.324746	0.101051	0.0273208	0.00676915	0.0101134	neutral	happy
0.25	25	15	Control	SDM5	mixed	0.266344	0.0935557	0.0144776	0.0651737	0.00365443	neutral	happy
0.28	25	17	Control	SDM1	neutral	0.320879	0.0108349	0.0155972	0.330886	0.0140543	angry	angry
0.28	25	17	Control	SDM2	mixed	0.324158	0.0157343	0.13532	0.1651	0.0379575	neutral	angry
0.28	25	17	Control	SDM3	neutral	0.27792	0.0125948	0.0295722	0.271456	0.0431523	neutral	angry
0.28	25	17	Control	SDM4	positive	0.278934	0.132546	0.12896	0.096872	0.0103882	neutral	happy
0.28	25	17	Control	SDM5	positive	0.278999	0.0258399	0.0951456	0.094313	0.0244042	neutral	sad
0.29	27	14	Control	SDM1	neutral	0.3228	0.00250102	0.00287715	0.0243614	2.49837e-05	neutral	angry
0.29	27	14	Control	SDM2	neutral	0.345521	0.0126225	0.00158337	0.0872674	0.000456775	neutral	angry
0.29	27	14	Control	SDM3	mixed	0.266201	0.00184173	0.00667311	0.101098	0.000217536	neutral	angry
0.29	27	14	Control	SDM4	negative	0.331845	0.00287797	0.00201957	0.169194	3.33922e-07	neutral	angry
0.29	27	14	Control	SDM5	negative	0.416941	0.00160293	0.00440167	0.0965279	5.77638e-06	neutral	angry
CCCTL09	21	12	Control	SDM1	positive	0.592229	0.082181	0.016104	0.101647	5e-05	neutral	angry
CCCTL09	21	12	Control	SDM2	mixed	0.649452	0.048874	0.0246916	0.0658072	0.000318533	neutral	angry
CCCTL09	21	12	Control	SDM3	neutral	0.537682	0.0795506	0.122836	0.0801356	0.0106608	neutral	angry
CCCTL09	21	12	Control	SDM4	neutral	0.10298	0.0712701	0.0138492	0.127337	0.000192236	angry	angry
CCCTL09	21	12	Control	SDM5	negative	0.579094	0.0701839	0.00962825	0.0907511	0.000199571	neutral	angry
DDCTL02	57	9	Control	SDM1	positive	0.799702	0.000186573	0.0427526	4.02964e-05	0.111367	neutral	scared
DDCTL02	57	9	Control	SDM2	positive	0.780369	3.26773e-05	0.0231199	0.000292823	0.175654	neutral	scared
DDCTL02	57	9	Control	SDM3	positive	0.670094	6.20328e-05	0.0225995	1.26432e-05	0.290652	neutral	scared
DDCTL02	57	9	Control	SDM4	positive	0.605085	4.04678e-05	0.0953515	3.00923e-05	0.362356	neutral	scared
DDCTL02	57	9	Control	SDM5	positive	0.769706	1.51084e-05	0.0294615	3.87402e-05	0.230362	neutral	scared
JCCTL11	32	14	Control	SDM1	positive	0.767352	0.0200951	3.58432e-05	0.00778242	5.75966e-05	neutral	happy
JCCTL11	32	14	Control	SDM2	positive	0.814015	0.050254	0.000219307	0.00553171	0.000108379	neutral	happy
JCCTL11	32	14	Control	SDM3	negative	0.742897	0.0622345	0.000225717	0.0191222	0.00020415	neutral	happy
JCCTL11	32	14	Control	SDM4	negative	0.822544	0.00601882	5.59244e-05	0.0306236	0.00133123	neutral	angry
JCCTL11	32	14	Control	SDM5	positive	0.78685	0.0808063	0.000147621	0.00791943	5.34419e-05	neutral	happy
JDCTL05	43	12	Control	SDM1	negative	0.31625	0.026842	0.0357424	0.0232677	0.285158	neutral	scared
JDCTL05	43	12	Control	SDM2	negative	0.33584	0.0026316	0.0554041	0.013339	0.273985	neutral	scared
JDCTL05	43	12	Control	SDM3	mixed	0.320958	0.00253257	0.0424879	0.031009	0.273808	neutral	scared
JDCTL05	43	12	Control	SDM4	positive	0.312087	0.021796	0.0525982	0.00569618	0.289898	neutral	scared
JDCTL05	43	12	Control	SDM5	mixed	0.392641	0.00589649	0.0519159	0.0209231	0.15307	neutral	scared
JMCCTL07	52	9	Control	SDM1	positive	0.231515	0.328861	0.0129029	0.0275255	0.008688	happy	happy
JMCCTL07	52	9	Control	SDM2	negative	0.228234	0.40533	0.0159098	0.00651257	0.00265206	happy	happy
JMCCTL07	52	9	Control	SDM3	positive	0.169371	0.584827	0.0825722	0.000171419	0.0036131	happy	happy
JMCCTL07	52	9	Control	SDM4	positive	0.168465	0.533771	0.0322276	1e-15	0.0218975	happy	happy
JMCCTL07	52	9	Control	SDM5	positive	0.193467	0.471041	0.0372124	0.0147339	0.01668	happy	happy
TPCTL10	27	14	Control	SDM1	positive	0.751082	0.0038491	0.0121782	0.0121925	5.48199e-05	neutral	angry
TPCTL10	27	14	Control	SDM2	mixed	0.722511	0.00193872	0.0103709	0.0502464	0.000983417	neutral	angry
TPCTL10	27	14	Control	SDM3	mixed	0.616857	0.0389347	0.00757597	0.111245	0.00124537	neutral	angry
TPCTL10	27	14	Control	SDM4	positive	0.473677	0.0852598	0.0154649	0.228671	0.0015472	neutral	angry
TPCTL10	27	14	Control	SDM5	mixed	0.550413	0.00484661	0.00537836	0.166402	0.00798045	neutral	angry
VSCTL06	32	14	Control	SDM1	negative	0.154973	0.508751	0.000204311	0.101303	0.00131045	happy	happy
VSCTL06	32	14	Control	SDM2	positive	0.0492837	0.867323	5.90311e-06	0.0227097	0.000810748	happy	happy
VSCTL06	32	14	Control	SDM3	neutral	0.0602349	0.850014	4.34083e-07	0.00996232	4.80835e-05	happy	happy
VSCTL06	32	14	Control	SDM4	negative	0.164005	0.533593	7.0142e-05	0.0585053	0.00220243	happy	happy
VSCTL06	32	14	Control	SDM5	neutral	0.0692053	0.828156	5.9281e-07	0.0376466	0.00244632	happy	happy
MCGCTL01	36	14	Control	SDM1	neutral	0.374223	0.237979	3.2279e-05	0.000406102	0.00291924	neutral	happy
MCGCTL01	36	14	Control	SDM2	negative	0.45807	0.225463	0.000265823	0.000322503	0.00434586	neutral	happy
MCGCTL01	36	14	Control	SDM3	positive	0.289549	0.314271	4.22088e-05	0.00916988	0.00631344	happy	happy
MCGCTL01	36	14	Control	SDM4	neutral	0.349147	0.132643	5.9618e-05	0.0106764	0.0279328	neutral	happy
MCGCTL01	36	14	Control	SDM5	neutral	0.48085	0.0925357	6.45869e-05	0.00616933	0.00531825	neutral	happy
MCGCTL03	45	14	Control	SDM1	positive	0.532987	0.0624908	0.00334616	0.00708038	0.00396698	neutral	happy
MCGCTL03	45	14	Control	SDM2	positive	0.630233	0.00578315	0.169643	0.00372821	9.76686e-07	neutral	sad
MCGCTL03	45	14	Control	SDM3	positive	0.487522	0.0241022	0.0409025	0.0136724	3.43998e-05	neutral	sad
MCGCTL03	45	14	Control	SDM4	negative	0.582207	0.00699255	0.0945935	0.0169276	8.17816e-05	neutral	sad
MCGCTL03	45	14	Control	SDM5	positive	0.612693	0.00704806	0.15189	0.00414425	1.94193e-06	neutral	sad
PBCTL03	49	9	Control	SDM1	positive	0.622778	0.139454	1.62491e-06	0.00012385	0.00376341	neutral	happy
PBCTL03	49	9	Control	SDM2	neutral	0.515507	0.112811	0.00551319	0.0045244	0.0454361	neutral	happy
PBCTL03	49	9	Control	SDM3	neutral	0.558414	0.0217949	0.00166607	0.0298677	0.0472277	neutral	scared
PBCTL03	49	9	Control	SDM4	neutral	0.478087	0.0634811	0.012036	0.0264046	0.00962276	neutral	happy
PBCTL03	49	9	Control	SDM5	negative	0.693211	0.0300056	0.000356991	0.00101383	0.0712788	neutral	scared
MBCTL02	50	14	Control	SDM1	positive	0.462518	0.221815	7.75145e-06	0.000382362	1.14988e-05	neutral	happy
MBCTL02	50	14	Control	SDM2	positive	0.5618	0.15087	5.85938e-05	0.000515898	1.03987e-05	neutral	happy
MBCTL02	50	14	Control	SDM3	positive	0.396777	0.232342	0.000373918	0.000801597	0.00741598	neutral	happy
MBCTL02	50	14	Control	SDM4	mixed	0.646661	0.136333	0.000751935	0.00726478	6.19853e-05	neutral	happy
MBCTL02	50	14	Control	SDM5	mixed	0.690998	0.0780328	0.000506875	0.00013255	5.53189e-06	neutral	happy
